# Supplementary material
Source: publisher figshare collection journal article supplement (https://diabetesjournals.figshare.com/articles/dataset/_/21912837)
Supplement: Supplementary file 1 [file 38871567]

SUPPLEMENTARY DATA

Supplementary Figure 1. Flowchart of the sMRI study population

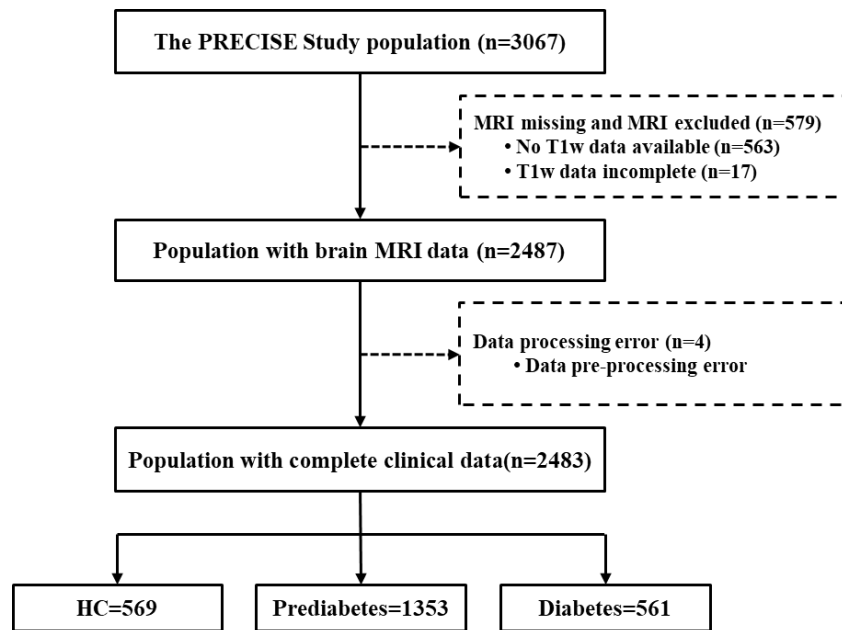

Supplementary Figure 2. Flowchart of the fMRI study population

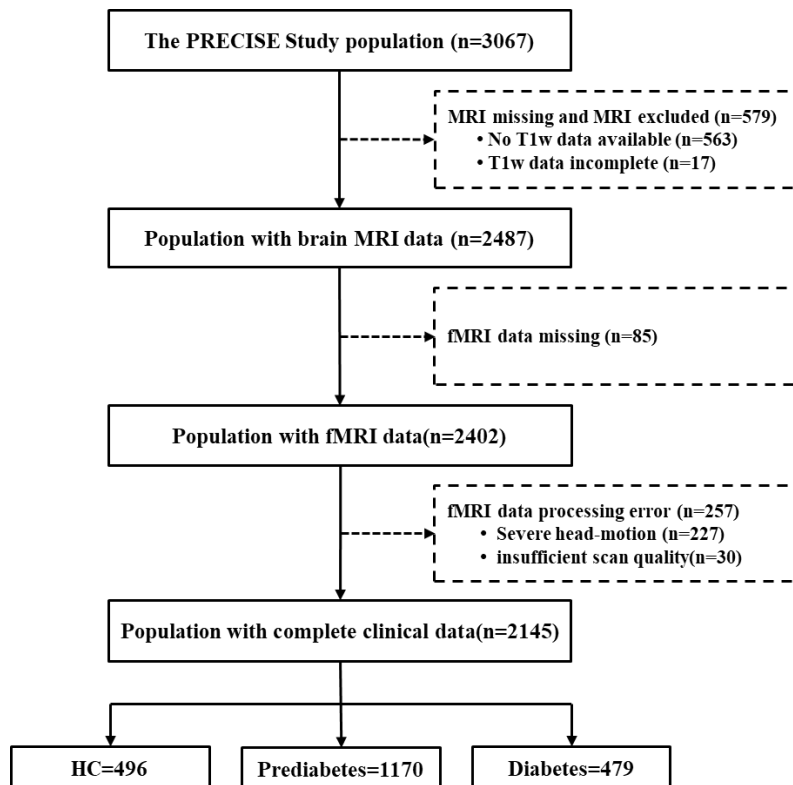

**Supplementary Figure 3.** Flowchart of the assessment of prediabetes and diabetes

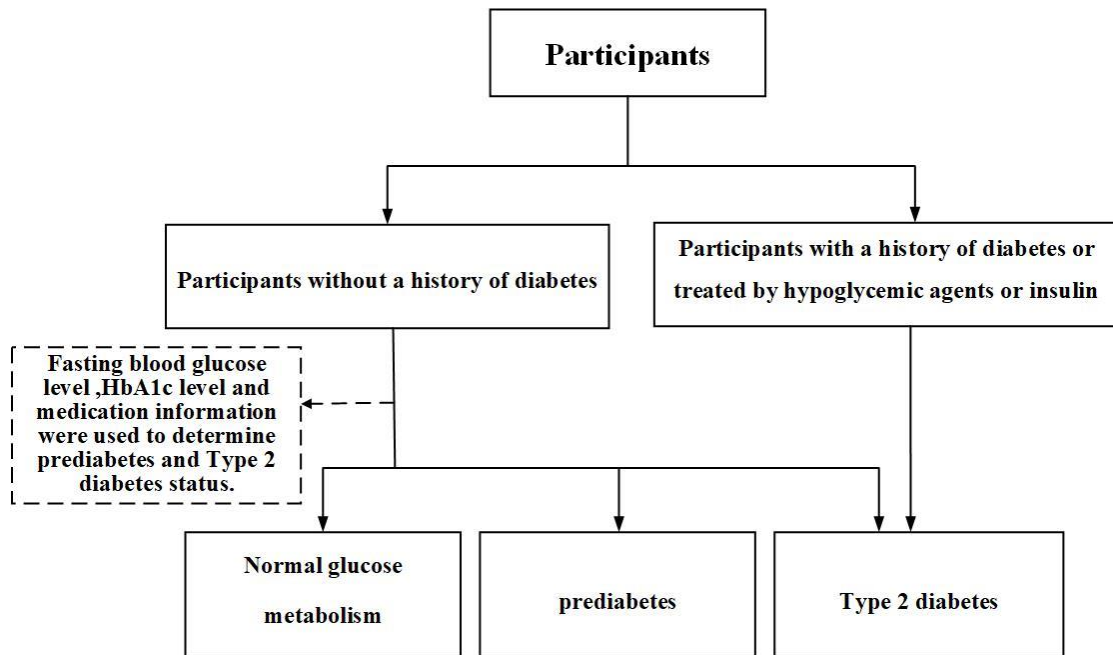

**Supplementary Table 1** Details of the 246 regions in Human Brainnetome atlas

| Lobe                    | Gyrus                        | Left and Right Hemisphere                | Anatomical and modified Cyto-architectonic descriptions | lh.MNI(X,Y,Z) | rh.MNI(X,Y,Z) |
|-------------------------|------------------------------|------------------------------------------|---------------------------------------------------------|---------------|---------------|
| Frontal Lobe            | SFG, Superior Frontal Gyrus  | SFG_L(R)_7_1                             | A8m, medial area 8                                      | -5, 15, 54    | 7, 16, 54     |
|                         |                              | SFG_L(R)_7_2                             | A8dl, dorsolateral area 8                               | -18, 24, 53   | 22, 26, 51    |
|                         |                              | SFG_L(R)_7_3                             | A9l, lateral area 9                                     | -11, 49, 40   | 13, 48, 40    |
|                         |                              | SFG_L(R)_7_4                             | A6dl, dorsolateral area 6                               | -18, -1, 65   | 20, 4, 64     |
|                         |                              | SFG_L(R)_7_5                             | A6m, medial area 6                                      | -6, -5, 58    | 7, -4, 60     |
|                         |                              | SFG_L(R)_7_6                             | A9m, medial area 9                                      | -5, 36, 38    | 6, 38, 35     |
|                         |                              | SFG_L(R)_7_7                             | A10m, medial area 10                                    | -8, 56, 15    | 8, 58, 13     |
|                         | MFG, Middle Frontal Gyrus    | MFG_L(R)_7_1                             | A9/46d, dorsal area 9/46                                | -27, 43, 31   | 30, 37, 36    |
|                         |                              | MFG_L(R)_7_2                             | IFJ, inferior frontal junction                          | -42, 13, 36   | 42, 11, 39    |
|                         |                              | MFG_L(R)_7_3                             | A46, area 46                                            | -28, 56, 12   | 28, 55, 17    |
|                         |                              | MFG_L(R)_7_4                             | A9/46v, ventral area 9/46                               | -41, 41, 16   | 42, 44, 14    |
|                         |                              | MFG_L(R)_7_5                             | A8vl, ventrolateral area 8                              | -33, 23, 45   | 42, 27, 39    |
|                         |                              | MFG_L(R)_7_6                             | A6vl, ventrolateral area 6                              | -32, 4, 55    | 34, 8, 54     |
|                         |                              | MFG_L(R)_7_7                             | A10l, lateral area 10                                   | -26, 60, -6   | 25, 61, -4    |
|                         | IFG, Inferior Frontal Gyrus  | IFG_L(R)_6_1                             | A44d, dorsal area 44                                    | -46, 13, 24   | 45, 16, 25    |
|                         |                              | IFG_L(R)_6_2                             | IFS, inferior frontal sulcus                            | -47, 32, 14   | 48, 35, 13    |
|                         |                              | IFG_L(R)_6_3                             | A45c, caudal area 45                                    | -53, 23, 11   | 54, 24, 12    |
|                         |                              | IFG_L(R)_6_4                             | A45r, rostral area 45                                   | -49, 36, -3   | 51, 36, -1    |
|                         |                              | IFG_L(R)_6_5                             | A44op, opercular area 44                                | -39, 23, 4    | 42, 22, 3     |
|                         |                              | IFG_L(R)_6_6                             | A44v, ventral area 44                                   | -52, 13, 6    | 54, 14, 11    |
|                         | OrG, Orbital Gyrus           | OrG_L(R)_6_1                             | A14m, medial area 14                                    | -7, 54, -7    | 6, 47, -7     |
| OrG_L(R)_6_2            |                              | A12/47o, orbital area 12/47              | -36, 33, -16                                            | 40, 39, -14   |               |
| OrG_L(R)_6_3            |                              | A11l, lateral area 11                    | -23, 38, -18                                            | 23, 36, -18   |               |
| OrG_L(R)_6_4            |                              | A11m, medial area 11                     | -6, 52, -19                                             | 6, 57, -16    |               |
| OrG_L(R)_6_5            |                              | A13, area 13                             | -10, 18, -19                                            | 9, 20, -19    |               |
| OrG_L(R)_6_6            |                              | A12/47l, lateral area 12/47              | -41, 32, -9                                             | 42, 31, -9    |               |
| PrG, Precentral Gyrus   | PrG_L(R)_6_1                 | A4hf, area 4(head and face region)       | -49, -8, 39                                             | 55, -2, 33    |               |
|                         | PrG_L(R)_6_2                 | A6cdl, caudal dorsolateral area 6        | -32, -9, 58                                             | 33, -7, 57    |               |
|                         | PrG_L(R)_6_3                 | A4ul, area 4(upper limb region)          | -26, -25, 63                                            | 34, -19, 59   |               |
|                         | PrG_L(R)_6_4                 | A4t, area 4(trunk region)                | -13, -20, 73                                            | 15, -22, 71   |               |
|                         | PrG_L(R)_6_5                 | A4tl, area 4(tongue and larynx region)   | -52, 0, 8                                               | 54, 4, 9      |               |
|                         | PrG_L(R)_6_6                 | A6cvl, caudal ventrolateral area 6       | -49, 5, 30                                              | 51, 7, 30     |               |
| PCL, Paracentral Lobule | PCL_L(R)_2_1                 | A1/2/3ll, area 1/2/3 (lower limb region) | -8, -38, 58                                             | 10, -34, 54   |               |
|                         | PCL_L(R)_2_2                 | A4ll, area 4, (lower limb region)        | -4, -23, 61                                             | 5, -21, 61    |               |
| Temporal Lobe           | STG, Superior Temporal Gyrus | STG_L(R)_6_1                             | A38m, medial area 38                                    | -32, 14, -34  | 31, 15, -34   |
|                         |                              | STG_L(R)_6_2                             | A41/42, area 41/42                                      | -54, -32, 12  | 54, -24, 11   |
|                         |                              | STG_L(R)_6_3                             | TE1.0 and TE1.2                                         | -50, -11, 1   | 51, -4, -1    |
|                         |                              | STG_L(R)_6_4                             | A22c, caudal area 22                                    | -62, -33, 7   | 66, -20, 6    |
|                         |                              | STG_L(R)_6_5                             | A38l, lateral area 38                                   | -45, 11, -20  | 47, 12, -20   |
|                         |                              | STG_L(R)_6_6                             | A22r, rostral area 22                                   | -55, -3, -10  | 56, -12, -5   |

|                                          |               |                                                             |               |              |
|------------------------------------------|---------------|-------------------------------------------------------------|---------------|--------------|
| MTG, Middle Temporal Gyrus               | MTG_L(R)_4_1  | A21c, caudal area 21                                        | -65, -30, -12 | 65, -29, -13 |
|                                          | MTG_L(R)_4_2  | A21r, rostral area 21                                       | -53, 2, -30   | 51, 6, -32   |
|                                          | MTG_L(R)_4_3  | A37dl, dorsolateral area37                                  | -59, -58, 4   | 60, -53, 3   |
|                                          | MTG_L(R)_4_4  | aSTS, anterior superior temporal sulcus                     | -58, -20, -9  | 58, -16, -10 |
| ITG, Inferior Temporal Gyrus             | ITG_L(R)_7_1  | A20iv, intermediate ventral area 20                         | -45, -26, -27 | 46, -14, -33 |
|                                          | ITG_L(R)_7_2  | A37elv, extreme lateroventral area37                        | -51, -57, -15 | 53, -52, -18 |
|                                          | ITG_L(R)_7_3  | A20r, rostral area 20                                       | -43, -2, -41  | 40, 0, -43   |
|                                          | ITG_L(R)_7_4  | A20il, intermediate lateral area 20                         | -56, -16, -28 | 55, -11, -32 |
|                                          | ITG_L(R)_7_5  | A37vl, ventrolateral area 37                                | -55, -60, -6  | 54, -57, -8  |
|                                          | ITG_L(R)_7_6  | A20cl, caudolateral of area 20                              | -59, -42, -16 | 61, -40, -17 |
|                                          | ITG_L(R)_7_7  | A20cv, caudoventral of area 20                              | -55, -31, -27 | 54, -31, -26 |
| FuG, Fusiform Gyrus                      | FuG_L(R)_3_1  | A20rv, rostroventral area 20                                | -33, -16, -32 | 33, -15, -34 |
|                                          | FuG_L(R)_3_2  | A37mv, medioventral area37                                  | -31, -64, -14 | 31, -62, -14 |
|                                          | FuG_L(R)_3_3  | A37lv, lateroventral area37                                 | -42, -51, -17 | 43, -49, -19 |
| PhG, Parahippocampal Gyrus               | PhG_L(R)_6_1  | A35/36r, rostral area 35/36                                 | -27, -7, -34  | 28, -8, -33  |
|                                          | PhG_L(R)_6_2  | A35/36c, caudal area 35/36                                  | -25, -25, -26 | 26, -23, -27 |
|                                          | PhG_L(R)_6_3  | TL, area TL (lateral PPHC, posterior parahippocampal gyrus) | -28, -32, -18 | 30, -30, -18 |
|                                          | PhG_L(R)_6_4  | A28/34, area 28/34 (EC, entorhinal cortex)                  | -19, -12, -30 | 19, -10, -30 |
|                                          | PhG_L(R)_6_5  | TI, area TI (temporal agranular insular cortex)             | -23, 2, -32   | 22, 1, -36   |
|                                          | PhG_L(R)_6_6  | TH, area TH (medial PPHC)                                   | -17, -39, -10 | 19, -36, -11 |
| pSTS, posterior Superior Temporal Sulcus | pSTS_L(R)_2_1 | rpSTS, rostroposterior superior temporal sulcus             | -54, -40, 4   | 53, -37, 3   |
|                                          | pSTS_L(R)_2_2 | cpSTS, caudoposterior superior temporal sulcus              | -52, -50, 11  | 57, -40, 12  |
| SPL, Superior Parietal Lobule            | SPL_L(R)_5_1  | A7r, rostral area 7                                         | -16, -60, 63  | 19, -57, 65  |
|                                          | SPL_L(R)_5_2  | A7c, caudal area 7                                          | -15, -71, 52  | 19, -69, 54  |
|                                          | SPL_L(R)_5_3  | A5l, lateral area 5                                         | -33, -47, 50  | 35, -42, 54  |
|                                          | SPL_L(R)_5_4  | A7pc, postcentral area 7                                    | -22, -47, 65  | 23, -43, 67  |
|                                          | SPL_L(R)_5_5  | A7ip, intraparietal area 7(hIP3)                            | -27, -59, 54  | 31, -54, 53  |
| IPL, Inferior Parietal Lobule            | IPL_L(R)_6_1  | A39c, caudal area 39(PGp)                                   | -34, -80, 29  | 45, -71, 20  |
|                                          | IPL_L(R)_6_2  | A39rd, rostrordorsal area 39(Hip3)                          | -38, -61, 46  | 39, -65, 44  |
|                                          | IPL_L(R)_6_3  | A40rd, rostrordorsal area 40(PFt)                           | -51, -33, 42  | 47, -35, 45  |
|                                          | IPL_L(R)_6_4  | A40c, caudal area 40(PFm)                                   | -56, -49, 38  | 57, -44, 38  |
|                                          | IPL_L(R)_6_5  | A39rv, rostroventral area 39(PGa)                           | -47, -65, 26  | 53, -54, 25  |
|                                          | IPL_L(R)_6_6  | A40rv, rostroventral area 40(PFop)                          | -53, -31, 23  | 55, -26, 26  |
| Pcun, Precuneus                          | PCun_L(R)_4_1 | A7m, medial area 7(PEp)                                     | -5, -63, 51   | 6, -65, 51   |
|                                          | PCun_L(R)_4_2 | A5m, medial area 5(PEm)                                     | -8, -47, 57   | 7, -47, 58   |
|                                          | PCun_L(R)_4_3 | dmPOS, dorsomedial parietooccipital sulcus(PEr)             | -12, -67, 25  | 16, -64, 25  |
|                                          | PCun_L(R)_4_4 | A31, area 31 (Lc1)                                          | -6, -55, 34   | 6, -54, 35   |
| PoG, Postcentral Gyrus                   | PoG_L(R)_4_1  | A1/2/3ulhf, area 1/2/3(upper limb, head and face region)    | -50, -16, 43  | 50, -14, 44  |
|                                          | PoG_L(R)_4_2  | A1/2/3tonla, area 1/2/3(tongue and larynx region)           | -56, -14, 16  | 56, -10, 15  |
|                                          | PoG_L(R)_4_3  | A2, area 2                                                  | -46, -30, 50  | 48, -24, 48  |
|                                          | PoG_L(R)_4_4  | A1/2/3tru, area1/2/3(trunk region)                          | -21, -35, 68  | 20, -33, 69  |

|                       |                                          |                                      |                                                  |               |              |
|-----------------------|------------------------------------------|--------------------------------------|--------------------------------------------------|---------------|--------------|
| Insular<br>Lobe       | INS, Insular Gyrus                       | INS_L(R)_6_1                         | G, hypergranular insula                          | -36, -20, 10  | 37, -18, 8   |
|                       |                                          | INS_L(R)_6_2                         | vIa, ventral agranular insula                    | -32, 14, -13  | 33, 14, -13  |
|                       |                                          | INS_L(R)_6_3                         | dIa, dorsal agranular insula                     | -34, 18, 1    | 36, 18, 1    |
|                       |                                          | INS_L(R)_6_4                         | vId/vIg, ventral dysgranular and granular insula | -38, -4, -9   | 39, -2, -9   |
|                       |                                          | INS_L(R)_6_5                         | dIg, dorsal granular insula                      | -38, -8, 8    | 39, -7, 8    |
|                       |                                          | INS_L(R)_6_6                         | dId, dorsal dysgranular insula                   | -38, 5, 5     | 38, 5, 5     |
| Limbic<br>Lobe        | CG, Cingulate Gyrus                      | CG_L(R)_7_1                          | A23d, dorsal area 23                             | -4, -39, 31   | 4, -37, 32   |
|                       |                                          | CG_L(R)_7_2                          | A24rv, rostroventral area 24                     | -3, 8, 25     | 5, 22, 12    |
|                       |                                          | CG_L(R)_7_3                          | A32p, pregenual area 32                          | -6, 34, 21    | 5, 28, 27    |
|                       |                                          | CG_L(R)_7_4                          | A23v, ventral area 23                            | -8, -47, 10   | 9, -44, 11   |
|                       |                                          | CG_L(R)_7_5                          | A24cd, caudodorsal area 24                       | -5, 7, 37     | 4, 6, 38     |
|                       |                                          | CG_L(R)_7_6                          | A23c, caudal area 23                             | -7, -23, 41   | 6, -20, 40   |
|                       |                                          | CG_L(R)_7_7                          | A32sg, subgenual area 32                         | -4, 39, -2    | 5, 41, 6     |
| Occipital<br>Lobe     | MVOcC, MedioVentral<br>Occipital Cortex  | MVOcC_L(R)_5_1                       | cLinG, caudal lingual gyrus                      | -11, -82, -11 | 10, -85, -9  |
|                       |                                          | MVOcC_L(R)_5_2                       | rCunG, rostral cuneus gyrus                      | -5, -81, 10   | 7, -76, 11   |
|                       |                                          | MVOcC_L(R)_5_3                       | cCunG, caudal cuneus gyrus                       | -6, -94, 1    | 8, -90, 12   |
|                       |                                          | MVOcC_L(R)_5_4                       | rLinG, rostral lingual gyrus                     | -17, -60, -6  | 18, -60, -7  |
|                       |                                          | MVOcC_L(R)_5_5                       | vmPOS, ventromedial parietooccipital sulcus      | -13, -68, 12  | 15, -63, 12  |
|                       | LOcC, lateral Occipital<br>Cortex        | LOcC_L(R)_4_1                        | mOccG, middle occipital gyrus                    | -31, -89, 11  | 34, -86, 11  |
|                       |                                          | LOcC_L(R)_4_2                        | V5/MT+, area V5/MT+                              | -46, -74, 3   | 48, -70, -1  |
|                       |                                          | LOcC_L(R)_4_3                        | OPC, occipital polar cortex                      | -18, -99, 2   | 22, -97, 4   |
|                       |                                          | LOcC_L(R)_4_4                        | iOccG, inferior occipital gyrus                  | -30, -88, -12 | 32, -85, -12 |
|                       |                                          | LOcC_L(R)_2_1                        | msOccG, medial superior occipital gyrus          | -11, -88, 31  | 16, -85, 34  |
| LOcC_L(R)_2_2         | lsOccG, lateral superior occipital gyrus | -22, -77, 36                         | 29, -75, 36                                      |               |              |
| Subcortical<br>Nuclei | Amyg, Amygdala                           | Amyg_L(R)_2_1                        | mAmyg, medial amygdala                           | -19, -2, -20  | 19, -2, -19  |
|                       |                                          | Amyg_L(R)_2_2                        | lAmyg, lateral amygdala                          | -27, -4, -20  | 28, -3, -20  |
|                       | Hipp, Hippocampus                        | Hipp_L(R)_2_1                        | rHipp, rostral hippocampus                       | -22, -14, -19 | 22, -12, -20 |
|                       |                                          | Hipp_L(R)_2_2                        | cHipp, caudal hippocampus                        | -28, -30, -10 | 29, -27, -10 |
|                       | BG, Basal Ganglia                        | BG_L(R)_6_1                          | vCa, ventral caudate                             | -12, 14, 0    | 15, 14, -2   |
|                       |                                          | BG_L(R)_6_2                          | GP, globus pallidus                              | -22, -2, 4    | 22, -2, 3    |
| BG_L(R)_6_3           |                                          | NAC, nucleus accumbens               | -17, 3, -9                                       | 15, 8, -9     |              |
| BG_L(R)_6_4           |                                          | vmPu, ventromedial putamen           | -23, 7, -4                                       | 22, 8, -1     |              |
| BG_L(R)_6_5           |                                          | dCa, dorsal caudate                  | -14, 2, 16                                       | 14, 5, 14     |              |
| BG_L(R)_6_6           |                                          | dIPu, dorsolateral putamen           | -28, -5, 2                                       | 29, -3, 1     |              |
| Tha, Thalamus         | Tha_L(R)_8_1                             | mPFtha, medial pre-frontal thalamus  | -7, -12, 5                                       | 7, -11, 6     |              |
|                       | Tha_L(R)_8_2                             | mPMtha, pre-motor thalamus           | -18, -13, 3                                      | 12, -14, 1    |              |
|                       | Tha_L(R)_8_3                             | Stha, sensory thalamus               | -18, -23, 4                                      | 18, -22, 3    |              |
|                       | Tha_L(R)_8_4                             | rTtha, rostral temporal thalamus     | -7, -14, 7                                       | 3, -13, 5     |              |
|                       | Tha_L(R)_8_5                             | PPtha, posterior parietal thalamus   | -16, -24, 6                                      | 15, -25, 6    |              |
|                       | Tha_L(R)_8_6                             | Otha, occipital thalamus             | -15, -28, 4                                      | 13, -27, 8    |              |
|                       | Tha_L(R)_8_7                             | cTtha, caudal temporal thalamus      | -12, -22, 13                                     | 10, -14, 14   |              |
|                       | Tha_L(R)_8_8                             | IPFtha, lateral pre-frontal thalamus | -11, -14, 2                                      | 13, -16, 7    |              |

**Supplementary Table 2.** Clinical characteristics of the study population and the subjects excluded from the study

| Characteristic                                                                          | Study population<br>(n = 2483) | Excluded from the study<br>(n = 584) | P     |
|-----------------------------------------------------------------------------------------|--------------------------------|--------------------------------------|-------|
| <b>Demographics</b>                                                                     |                                |                                      |       |
| Age (years)                                                                             | 61.4±6.6                       | 60.2 ±6.9                            | <.001 |
| Sex (% female)                                                                          | 53.4                           | 53.6                                 | 0.979 |
| <b>Glucose metabolism</b>                                                               |                                |                                      |       |
| Fasting glucose (mmol/L)                                                                | 6.0 ±1.6                       | 5.7±1.6                              | <.001 |
| 2-h post-load glucose (mmol/L) *                                                        | 7.7±2.9                        | 8.0±3.2                              | 0.026 |
| HbA1c (%)                                                                               | 6.0 ±1.0                       | 5.8±0.8                              | <.001 |
| HbA1c (mmol/mol)                                                                        | 41.8±10.6                      | 39.5±9.1                             | <.001 |
| <b>Cardiovascular risk factors</b>                                                      |                                |                                      |       |
| BMI (kg/m <sup>2</sup> )                                                                | 24.0 ±3.0                      | 22.9±3.0                             | <.001 |
| Systolic BP (mmHg)                                                                      | 130.1±16.3                     | 125.9±16.2                           | <.001 |
| Diastolic BP (mmHg)                                                                     | 75.5±9.0                       | 73.8±9.3                             | <.001 |
| Hypertension (%)                                                                        | 44.3                           | 37.8                                 | 0.004 |
| Total-to-HDL cholesterol ratio                                                          | 4.0±1.1                        | 4.07±1.2                             | 0.032 |
| Triglycerides (mmol/L)                                                                  | 1.8±1.3                        | 1.7±1.2                              | 0.023 |
| eGFR (mL/min/1.73 m <sup>2</sup> )                                                      | 101.9±12.5                     | 102.2±12.0                           | 0.769 |
| History of stroke (%)                                                                   | 2.7                            | 3.3                                  | 0.500 |
| History of heart disease (%)                                                            | 8.6                            | 5.8                                  | 0.024 |
| <b>Medication use (%)</b>                                                               |                                |                                      |       |
| Lipid-lowering                                                                          | 4.5                            | 1.4                                  | <.001 |
| Antihypertensive                                                                        | 27.0                           | 26.4                                 | 0.700 |
| <b>MoCA</b>                                                                             |                                |                                      |       |
|                                                                                         | 21.6±4.8                       | 20.5±4.9                             | <.001 |
| <b>Lifestyle factors (%)</b>                                                            |                                |                                      |       |
| Smoking, never/current/quit                                                             | 64.4/22.8/12.7                 | 61.0/25.2/13.9                       | 0.289 |
| Education illiteracy or elementary school /<br>middle or high school / college or above | 41.0/51.4/7.7                  | 59.2/40.6/0.2                        | <.001 |

Data are presented as means ± SD or percentage. Fasting glucose values were available in n = 3065. 2-h post-load glucose values were available in n = 2760. Total-to-HDL cholesterol ratio values were available in n = 3065. Triglycerides values were available in n = 3065. eGFR values were available in n = 3065.

BMI, body mass index; BP, blood pressure; HDL, high-density lipoproteins; eGFR, estimated glomerular filtration rate.

**Supplementary Table 3** Multivariable-adjusted associations of MoCA with the brain volume

| Region volume | Model 1              |                  | Model 2              |                  |
|---------------|----------------------|------------------|----------------------|------------------|
|               | $\beta$ (95%CI)      | <i>P</i>         | $\beta$ (95%CI)      | <i>P</i>         |
| <b>SUB</b>    | 0.098 (0.058,0.137)  | <b>&lt;0.001</b> | 0.098 (0.058,0.138)  | <b>&lt;0.001</b> |
| <b>THA.L</b>  | 0.112 (0.074,0.151)  | <b>&lt;0.001</b> | 0.108 (0.070,0.147)  | <b>&lt;0.001</b> |
| <b>THA.R</b>  | 0.085 (0.046,0.124)  | <b>&lt;0.001</b> | 0.082 (0.043,0.121)  | <b>&lt;0.001</b> |
| <b>CAU.L</b>  | 0.018 (-0.018,0.054) | 0.329            | 0.021 (-0.015,0.057) | 0.251            |
| <b>CAU.R</b>  | 0.013 (-0.022,0.049) | 0.454            | 0.019 (-0.017,0.054) | 0.303            |
| <b>PUT.L</b>  | 0.038 (0.001,0.074)  | <b>0.042</b>     | 0.038 (0.001,0.074)  | <b>0.045</b>     |
| <b>PUT.R</b>  | 0.019 (-0.018,0.056) | 0.309            | 0.021 (-0.016,0.058) | 0.262            |
| <b>PAL.L</b>  | 0.030 (-0.004,0.065) | 0.086            | 0.031 (-0.004,0.066) | 0.079            |
| <b>PAL.R</b>  | 0.037 (0.002,0.072)  | <b>0.036</b>     | 0.036 (0.002,0.071)  | <b>0.041</b>     |
| <b>HIP.L</b>  | 0.120 (0.083,0.157)  | <b>&lt;0.001</b> | 0.120 (0.082,0.157)  | <b>&lt;0.001</b> |
| <b>HIP.R</b>  | 0.106 (0.070,0.142)  | <b>&lt;0.001</b> | 0.104 (0.068,0.141)  | <b>&lt;0.001</b> |
| <b>AMY.L</b>  | 0.108 (0.072,0.144)  | <b>&lt;0.001</b> | 0.111 (0.074,0.148)  | <b>&lt;0.001</b> |
| <b>AMY.R</b>  | 0.083 (0.047,0.120)  | <b>&lt;0.001</b> | 0.084 (0.047,0.121)  | <b>&lt;0.001</b> |
| <b>NAcc.L</b> | 0.032 (-0.003,0.067) | 0.071            | 0.027 (-0.008,0.061) | 0.132            |
| <b>NAcc.R</b> | 0.064 (0.029,0.099)  | <b>&lt;0.001</b> | 0.059 (0.024,0.095)  | <b>0.001</b>     |

Model 1: adjustment for age, sex, and education level. Model 2: model 1 additionally adjusted for BMI, hypertension, total-to-HDL cholesterol ratio, history of stroke, history of heart disease.

SUB, total subcortical gray matter; THA, thalamus; CAU, caudate; PUT, putamen; PAL, pallidum; HIP, hippocampus; AMY, amygdala;NAcc, nucleus accumbens; L, left; R, right.

**Supplementary Table 4** Multivariable-adjusted associations of MoCA with the functional connectivity

| Functional connectivity | Model 1                 |              | Model 2                 |              |
|-------------------------|-------------------------|--------------|-------------------------|--------------|
|                         | $\beta$ (95%CI)         | <i>P</i>     | $\beta$ (95%CI)         | <i>P</i>     |
| THA.L and VIS           | -0.040 (-0.076, -0.005) | <b>0.027</b> | -0.031 (-0.067,0.005)   | 0.093        |
| THA.R and VIS           | -0.050 (-0.086, -0.014) | <b>0.007</b> | -0.041 (-0.077, -0.004) | <b>0.029</b> |
| THA.L and SMN           | -0.052 (-0.088, -0.017) | <b>0.004</b> | -0.048 (-0.083, -0.013) | <b>0.007</b> |
| THA.R and SMN           | -0.030 (-0.065,0.006)   | 0.099        | -0.029 (-0.064,0.006)   | 0.107        |
| THA.L and DAN           | 0.010 (-0.026,0.046)    | 0.590        | 0.007 (-0.029,0.043)    | 0.712        |
| THA.R and DAN           | -0.007 (-0.043,0.029)   | 0.712        | -0.008 (-0.043,0.029)   | 0.666        |
| THA.L and VAN           | -0.045 (-0.08, -0.009)  | <b>0.013</b> | -0.040 (-0.076, -0.005) | <b>0.025</b> |
| THA.R and VAN           | -0.023 (-0.058,0.012)   | 0.200        | -0.020 (-0.055,0.015)   | 0.261        |
| THA.L and LIM           | 0.037 (0.002,0.073)     | <b>0.037</b> | 0.040 (0.005,0.075)     | <b>0.026</b> |
| THA.R and LIM           | 0.022 (-0.013,0.057)    | 0.219        | 0.024 (-0.011,0.059)    | 0.178        |
| THA.L and FPN           | 0.010 (-0.025,0.046)    | 0.565        | 0.012 (-0.023,0.047)    | 0.516        |
| THA.R and FPN           | 0.011 (-0.024,0.046)    | 0.540        | 0.013 (-0.022,0.048)    | 0.463        |
| THA.L and DMN           | -0.018 (-0.054,0.017)   | 0.319        | -0.010 (-0.046,0.026)   | 0.584        |
| THA.R and DMN           | -0.005 (-0.041,0.030)   | 0.764        | 0.002 (-0.034,0.037)    | 0.921        |

Model 1: adjustment for age, sex, and education level. Model 2: model 1 additionally adjusted for BMI, hypertension, total-to-HDL cholesterol ratio, history of stroke, history of heart disease.

THA, thalamus; L, left; R, right



**Supplementary Table 5** Multivariable-adjusted associations of functional connectivity with the brain volume

| Functional connectivity | Region volume | Model 1                 |              | Model 2                 |              |
|-------------------------|---------------|-------------------------|--------------|-------------------------|--------------|
|                         |               | $\beta$ (95%CI)         | <i>P</i>     | $\beta$ (95%CI)         | <i>P</i>     |
| THA.L and VIS           | THA.L         | -0.076 (-0.125, -0.027) | <b>0.002</b> | -0.075 (-0.124, -0.026) | <b>0.003</b> |
| THA.R and VIS           | THA.R         | -0.064 (-0.113, -0.015) | <b>0.010</b> | -0.064 (-0.113, -0.015) | <b>0.010</b> |
| THA.L and SMN           | THA.L         | 0.044 (-0.005,0.094)    | 0.080        | 0.047 (-0.003,0.097)    | 0.064        |
| THA.R and SMN           | THA.R         | 0.024 (-0.026,0.074)    | 0.340        | 0.024 (-0.026,0.074)    | 0.346        |
| THA.L and DAN           | THA.L         | -0.012 (-0.061,0.037)   | 0.621        | -0.016 (-0.065,0.033)   | 0.528        |
| THA.R and DAN           | THA.R         | -0.003 (-0.053,0.046)   | 0.895        | -0.004 (-0.054,0.045)   | 0.866        |
| THA.L and VAN           | THA.L         | 0.024 (-0.026,0.073)    | 0.347        | 0.029 (-0.021,0.079)    | 0.256        |
| THA.R and VAN           | THA.R         | 0.000 (-0.050,0.050)    | 0.999        | 0.002 (-0.048,0.053)    | 0.928        |
| THA.L and LIM           | THA.L         | 0.010 (-0.040,0.060)    | 0.691        | 0.005 (-0.045,0.055)    | 0.836        |
| THA.R and LIM           | THA.R         | 0.011 (-0.040,0.061)    | 0.680        | 0.004 (-0.046,0.054)    | 0.869        |
| THA.L and FPN           | THA.L         | -0.010 (-0.060,0.040)   | 0.692        | -0.007 (-0.057,0.043)   | 0.781        |
| THA.R and FPN           | THA.R         | -0.004 (-0.055,0.046)   | 0.861        | -0.002 (-0.052,0.049)   | 0.947        |
| THA.L and DMN           | THA.L         | -0.047 (-0.096,0.002)   | 0.062        | -0.045 (-0.094,0.005)   | 0.075        |
| THA.R and DMN           | THA.R         | -0.040 (-0.090,0.010)   | 0.116        | -0.041 (-0.094,0.009)   | 0.107        |

Model 1: adjustment for age, sex, and education level. Model 2: model 1 additionally adjusted for BMI, hypertension, total-to-HDL cholesterol ratio, history of stroke, history of heart disease.

THA, thalamus; L, left; R, right
